# Supplementary material for: A plausible link between the time-on-task effect and the sequential task effect
Source: PubMed Central journal article supplement (PMC9643466; doi:10.3389/fpsyg.2022.998393), 2022-10-26
Supplement: Presentation_1.pdf [file Presentation_1.pdf]

## Supplementary material

### 1. Determination of the sample size

Examining the correlation between the time-on-task effect and the sequential task effect requires to observe both effects in the same study and for the same participants. A previous experiment conducted with the same protocol (Mangin et al., 2021, exp. 3) required 51 participants to observe the sequential task effect and time-on-task effect. We tested the correlation on this sample of participants and obtained a marginal correlation:  $r = .245$ ,  $p = .081$ . Then, a power analysis on G\*Power was conducted to know how many participants it would be required to obtain a significant correlation with the following parameters: one tail, an alpha error probability of .05, and a power of .80. We obtained a sample size of 102 participants. Because of time and budget constraints we decided to conduct a study with 80 participants; i.e., a probability of .70 to obtain a significant correlation. Finally, we recruited 83 participants, but rejected 4 outlier participants.

### 2. Results concerning mean reaction time (RT) in the Stroop task while mixing the two types of trial

We conducted an ANOVA with Time-on-task (Part 1, Part 2, Part 3, Part 4) as repeated-measure factor on mean RT for correct responses in the Stroop task. We applied a correction of Greenhouse-Geisser on the degrees of freedom to compensate for any problem of sphericity. The effect of TOT was significant:  $F(2.2, 168.8) = 6.55$ ;  $p = .001$ ;  $\eta^2_p = .077$ . A post-hoc test with a correction of Holm showed that mean RT in Part 1 was marginally shorter than mean RT in Part 2 [ $t(234) = -2.39$ ;  $p = .071$ ;  $d = 0.13$ ], and significantly shorter than mean RT in Part 3 [ $t(234) = -3.62$ ;  $p = .002$ ;  $d = 0.19$ ] and Part 4 [ $t(234) = -4.02$ ;  $p < .001$ ;  $d = 0.21$ ]. All other differences did not reach significance. Figure A1 illustrates this effect.

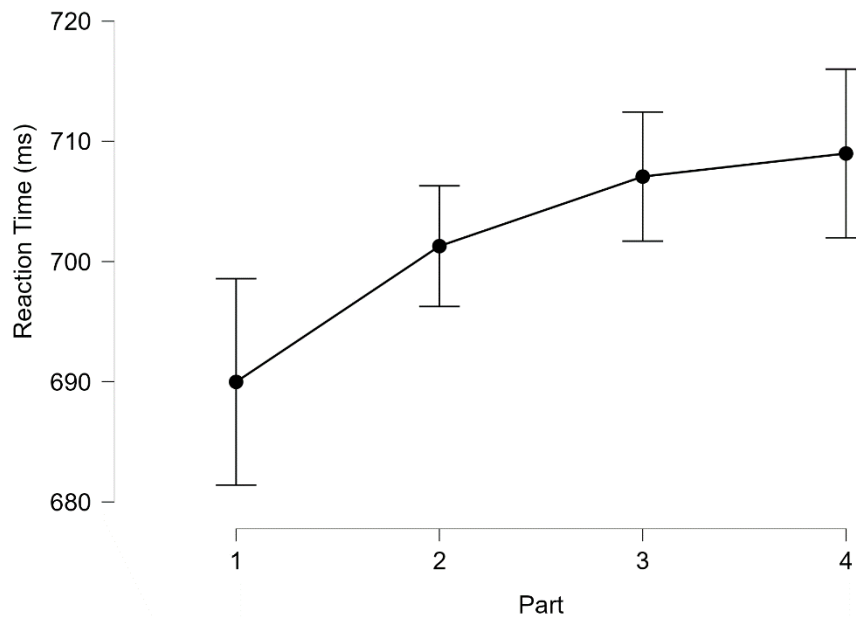

**Figure A1:** Effect of time-on-task in the Stroop task on mean RT for correct responses.

### 3. Results concerning error rates in the Stroop task while mixing the two types of trial

The same ANOVA design was applied to error rate in the Stroop task. The effect of TOT did not reach significance:  $F(2.24, 174.67) = 0.44$ ;  $p = .668$ . The mean error rate was .068.

Results on mean RT and error rate showed that participants kept the same strategy during the whole task and that there was no speed-accuracy tradeoff over time.

### 4. Results concerning mean reaction time (RT) in the Stroop task while differentiating the two types of trial

An ANOVA with Time-on-task (Part 1, Part 2, Part 3, Part 4) and Type of trial (reading the color name, naming the ink color) as within-subjects factors was conducted on the reaction time during the Stroop task. The interaction between these two effects reached

significance:  $F(3, 234) = 19.29, p < .001, \eta^2_p = .198$  (see Figure A2). A post-hoc test, revealed that for the ‘naming ink color’ trials, the part 1 ( $M = 757.65, SD = 89.56$ ) was different from the three others (part 2,  $M = 779.86, SD = 90.65$ ; part 3,  $M = 788.89, SD = 89.61$ ; part 4,  $M = 794.02, SD = 87.66$ , all  $ps < .001$ ). All the other comparisons concerning the ‘naming ink color’ trials did not reach significance (all  $ps > .072$ ). For the ‘reading color name’ trials, none of the comparison reached significance (all  $ps > .600$ ). These results support the fact that mental fatigue is closely related to cognitive control.

The main effect of Type of stimulus was significant:  $F(1, 78) = 570.02, p < .001, \eta^2_p = .880$ . Mean RT for ‘reading color name’ trials was consistently shorter than for ‘naming ink color’ trials regardless the part of the task (see Figure A2).

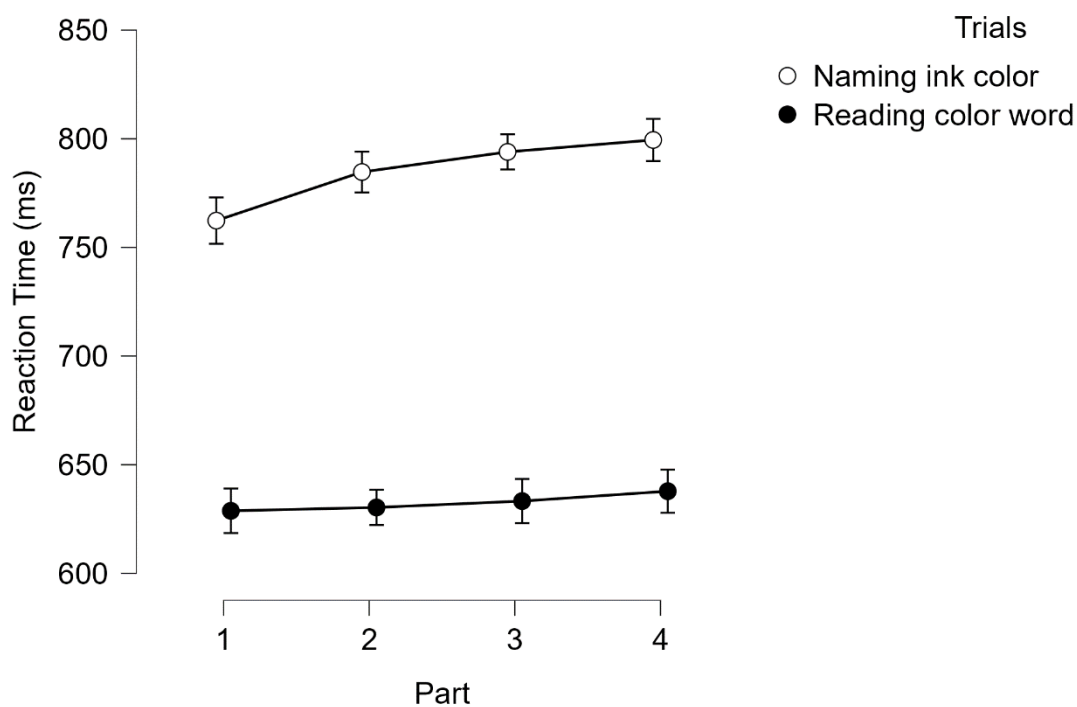

**Figure A2:** Mean reaction time in the incongruent Stroop task as a function of time-on-task and type of trials.

## **5. Results concerning error rates in the Stroop task while differentiating the two types of trial**

An ANOVA with Time-on-task (Part 1, Part 2, Part 3, Part 4) and Type of trial (reading the color name, naming the ink color) as within-subjects factors was conducted on the accuracy during the Stroop task. The interaction and the main effect of TOT did not reach significance:  $F(3, 234) = 1.27, p = .285, \eta^2_p = .016$ , and  $F(3, 234) = 0.49, p = .689, \eta^2_p = .006$ , respectively. By contrast, the main effect of the Type of trial was significant:  $F(1, 78) = 68.98, p < .001, \eta^2_p = .469$ . Participants showed a higher accuracy for the ‘reading color name’ trials ( $M = 97.5\%$ ,  $SD = 2.8\%$ ) than for the ‘naming ink color’ trials ( $M = 91.1\%$ ,  $SD = 8.6\%$ ).

## **6. Correlations between subjective variables and behavioral phenomena of interest**

A first series of correlations has been examined between subjective variables (boredom and fatigue) and behavioral effects of interest (time-on task effect, sequential task effect) while mixing the two types of trial for the time-on-task (TOT) effect. In this case the subjective score assessed just after the Stroop task was considered to calculate the correlation (and not the composite score as reported in the article). For these correlations the TOT effect was calculated by subtracting the IES scores of the fourth part from the first part of the Stroop task, and then divided this difference by the IES score of the first part.

TOT effect and boredom score after the Stroop task:  $r = -.348, p = .002$ .

Sequential task effect and boredom score after the Stroop task:  $r = -.174, p = .126$ .

TOT effect and fatigue score after the Stroop task:  $r = -.184, p = .104$ .

Sequential task effect and fatigue score after the Stroop task:  $r = -.077, p = .503$ .

A second series of correlations has been examined between subjective variables (boredom and fatigue) and behavioral effects of interest (TOT effect, sequential task effect)

while differentiating the two types of trial for the time-on-task effect (see Table A1). For these correlations, the TOT effect was calculated by subtracting the mean reaction time for correct responses when the participants had to name the ink color of the fourth part from the first part of the Stroop task, and then divided this difference by the reaction time of the first part.

**Table A1:** Correlations between TOT effect and other variables of interest. \* = significant correlation between the variables.

| Variable        | Time-on-task IES           | Sequential task effect     | Boredom                     | Fatigue                   |
|-----------------|----------------------------|----------------------------|-----------------------------|---------------------------|
| Time-on-task RT | $r = .821$<br>$p < .001^*$ | $r = .270$<br>$p = .016^*$ | $r = -.312$<br>$p = .005^*$ | $r = -.132$<br>$p = .246$ |

## 7. Mediation analysis

In order to be sure that boredom mediated the relationship between the time-on-task effect and the sequential task effect, we should first obtain a significant correlation between the three variables. As mentioned in Figure A2, the correlation between the boredom index (i.e., the difference between the boredom score after the Stroop task minus the boredom score after the Video task) and the sequential task effect was marginal,  $r = -.216$ ,  $p = .055$ . By contrast, the correlation between the boredom index and the time-on-task effect was significant:  $r = -.332$ ,  $p = .003$ . Then, a mediation analysis was conducted with bootstrap for 5000 samples. The total effect was significant,  $\beta$  (standardized) = 0.272,  $p = .013$ . The indirect effect was not significant:  $\beta = 0.047$ ,  $p = .249$ . Finally, the direct effect, when controlling for the boredom index, was at the limit of significance:  $\beta = 0.25$ ,  $p = .050$ . This made the mediation analysis inconclusive, because the direct effect was at the limit of significance.

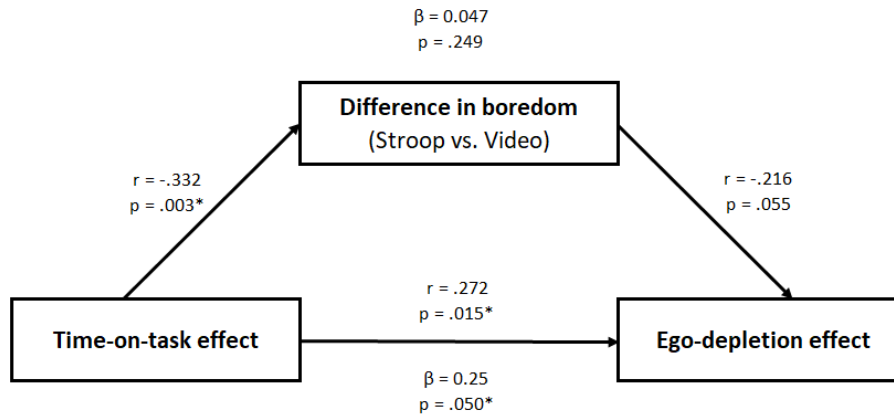

**Figure A2:** Mediation analysis between the time-on-task effect, the sequential task effect and the boredom index. \* = significant correlation between two variables.

## 8. A systematic review of studies analyzing the time-on-task effect within the sequential task protocol

This systematic review aimed to examine if studies using the sequential task protocol with a long depleting task (duration  $\geq 30$  min) analyzed the performance in the depleting task as a function of time-on-task and the correlation between the time-on-task effect and the sequential task effect; two phenomena generally interpreted as manifestations of mental or cognitive fatigue.

To be included in the systematic review, a study should use the sequential task protocol with a depleting task and a control task longer than 20 min. The meta-analysis of Hagger et al. (2010) showed that the literature from social psychology mainly used short-duration depleting tasks (see appendix B of the Hagger's et al. meta-analysis). This meta-analysis included 198 experiments. A total of 25.3% of these experiments did not report the duration of the depleting task. The mean duration of the 140 remaining experiments was 6.27 min (SD = 3.22 min). Among these 140 experiments, only two used a depleting task with a duration of 20 and 30 min respectively (Tyler & Burns, 2009; Finkel et al., 2006 – exp. 5). None of these two

studies analyzed the performance of the depleting task as a function of time on task.

Consequently, the systematic review focused on studies from sport sciences examining the effect of mental fatigue on a subsequent physical performance.

Sources that was used to identify studies for the systematic review included Academic Search Complete, CINAHL with full text, APA PsycINFO, and SPORTDiscuss with full text through the EBSCO platform. The search strategy was the following: AB ((mental N0 fatigue OR cognitive N0 fatigue) AND (control N0 condition OR control N0 treatment OR control N0 trial OR control N0 task)). The flow chart of the systematic review is represented on Figure A3. The selected studies are listed in Table A2. This table clearly showed that out of the 56 listed studies, 40 (71.43%) observed a sequential task effect on the performance of the dependent task, and only 10 (17.86%) reported a time-on-task effect on the performance of the depleting task. By contrast, only 5 studies (8.93%) observed a practice effect on the performance of the depleting task and 10 (17.86%) did not observe a significant effect on this dependent variable. Concerning our main hypothesis, only 8 studies (14.29%) observed both a time-on-task effect and a sequential task effect and were able to calculate a correlation between these two effects, but none of these 8 studies reported this correlation. The small sample size of these 8 studies ( $10 < N < 25$ ;  $M = 16.6$ ;  $SD = 6.2$ ) can explain why they did not report the correlation between the two effects of interest. Finally, among the 56 studies listed in table A2, 32 (57.14%) did not report the performance of the depleting task as a function of time-on-task and consequently were not interested by the effect of mental fatigue that could be observed in the depleting task.

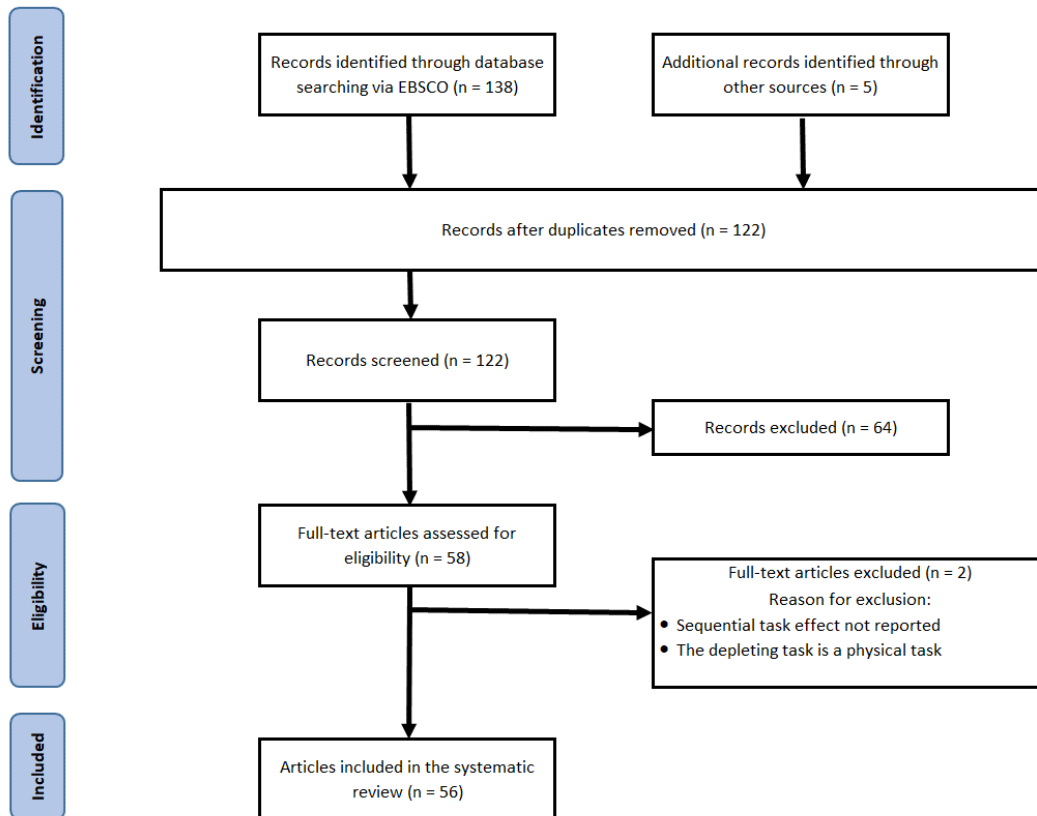

**Figure A3:** Flow chart of the systematic review on studies using the sequential task protocols and a depleting task with a duration above 20 minutes.

## References

Azevedo, R., Silva-Cavalcante, M. D., Gualano, B., Lima-Silva, A. E. & Bertuzzi, R. (2016).

Effects of caffeine ingestion on endurance performance in mentally fatigued individuals. *European Journal of Applied Physiology*, *116*, 2293-2303. doi: 10.1007/s00421-016-3483-y

Badin, O. O., Smith, M. R., Conte, D., & Coutts, A. J. (2016). Mental fatigue: Impairment of technical performance in small-sided soccer games. *International Journal of Sports Physiology and Performance*, *11*, 1100 -1105. <http://dx.doi.org/10.1123/ijsp.2015-0710>



- Batista, M. M., Paludo, A. C., Da Silva, M. P., Martins, M. V., Pauli, P. H., Dal'maz, G., Stefanello, J. M., & Tartaruga, M. P. (2021). Effect of mental fatigue on performance, perceptual and physiological responses in orienteering athletes. *Journal of Sports Medicine and Physical Fitness*, *61*(5), 673-679. doi: 10.23736/S0022-4707.21.11334-9
- Brown, D. M. Y., & Bray, S. R. (2019). Effects of mental fatigue on exercise intentions and behavior. *Annals of Behavioral Medicine*, *53*, 405-414. doi: 10.1093/abm/kay052
- Brownsberger, J., Edwards, A., Crowther, R., & Cottrell, D. (2013). Impact of mental fatigue on self-paced exercise. *International Journal of Sports Medicine*, *34*, 1029-1036. doi: 10.1055/s-0033-1343402
- Budini, F., Labanca, L., Scholz, M., & Macaluso, A. (2022). Tremor, finger and hand dexterity and force steadiness, do not change after mental fatigue in healthy humans. *PLoS ONE*, *17*(8), e0272033. <https://doi.org/10.1371/journal.pone.0272033>
- Campos, B. T., Penna, E. M., Rodrigues, J. G. S., Mendes, T. T., Maia-Lima, A., Nakamura, F. Y., Vieira, E. L. M., Wanner, S. P., & Prado, L. S. (2021). Influence of mental fatigue on physical performance, and physiological and perceptual responses of judokas submitted to the special Judo Fitness Test. *Journal of Strength and Conditioning Research*, *36*(2), 461-468. doi: 10.1519/JSC.00000000000003453
- Ciocca, G., Tessitore, A., Mandorino, M., & Tschan, H. (2022). Video-based tactical task does not elicit mental fatigue and does not impair soccer performance in a subsequent small-sided game. *Sports*, *10*, 31. <https://doi.org/10.3390/sports10030031>
- Coutinho, D., Gonçalves, B., Wong, D. P., Travassos, B., Coutts, A. J., & Sampaio, J. (2018). Exploring the effects of mental and muscular fatigue in soccer players' performance. *Human Movement Science*, *58*, 287-296. <https://doi.org/10.1016/j.humov.2018.03.004>

- Dallaway, N., Lucas, S. J. E., & Ring, C. (2022). Cognitive tasks elicit mental fatigue and impair subsequent physical task endurance: Effects of task duration and type. *Psychophysiology*, e14126, <https://doi.org/10.1111/psyp.14126>
- Duncan, M. J., Fowler, N., George, O., Joyce, S. & Hankey, J. (2015). Mental fatigue negatively influences manual dexterity and anticipation timing but not repeated high-intensity exercise performance in trained adults. *Research in Sports Medicine*, 23, 1-13. doi: 10.1080/15438627.2014.975811
- Ferreira, A., Jr., Chierotti, P., Gabardo, J. M., Giovanini, B., Okano, A. H., Buzzachera, C. F., Okazaki, V. H. A., Okuno, N. M., & Altimari, L. R. (2020). Residual effects of mental fatigue on subjective fatigue, reaction time and cardiac responses. *Revista de Psicología del Deporte [Journal of Sport Psychology]*, 29(2), 27-34.
- Ferris, J. R., Tomlinson, M. A., Ward, T. N., Pepin, M. E., & Malek, M. H. (2021). Reduced electromyographic fatigue threshold after performing a cognitive fatiguing task. *Journal of Strength and Conditioning Research*, 35(1), 267-274. DOI: 10.1519/JSC.0000000000002490
- Filipas, L., Gallo, G., Pollastri, L., & La Torre, A. (2019). Mental fatigue impairs time trial performance in sub-elite under 23 cyclists. *PloS ONE*, 14(6), e0218405. <https://doi.org/10.1371/journal.pone.0218405>
- Filipas, L., Borghi, S., La Torre, A., & Smith, M. R. (2021). Effects of mental fatigue on soccer-specific performance in young players. *Science and Medicine in Football*, 5(2), 150-157. <https://doi.org/10.1080/24733938.2020.1823012>
- Fortes, L. S., Berriel, G. P., Faro, H., Freitas-Júnior, C. G., & Peyré-Tartaruga, L. A. (2022a). Can prolongate use of social media immediately before training worsen high level male volleyball players' visuomotor skills? *Perceptual and Motor Skills*. <https://doi.org/10.1177/00315125221123635>

- Fortes, L. S., Lima-Junior, D., Barbosa, B. T., Faro, H. K. C., Ferreira, M. E. C., & Almeida, S. S. (2022b). Effect of mental fatigue on decision-making skill and visual search behaviour in basketball players: An experimental and randomised study. *International Journal of Sport and Exercise Psychology*. doi: 10.1080/1612197X.2022.2058055
- Gantois, P., Ferreira, M. E. C., de Lima-Junior, D., Nakamura, F. Y., Batista, G. R., Fonseca, F. S. & Sousa Fortes, L. de (2020) Effects of mental fatigue on passing decision-making performance in professional soccer athletes, *European Journal of Sport Science*, 20(4), 534-543. <https://doi.org/10.1080/17461391.2019.1656781>
- Gantois, P., Lima-Júnior, D. de, Fortes, L. de S., Batista, G. R., Nakamura, F. Y., & Fonseca, F. de S. (2021). Mental fatigue from smartphone use reduces volume-load in resistance training: A randomized, single-blinded cross-over study. *Perceptual and Motor Skills*, 128(4), 1640-1659. <https://doi.org/10.1177/00315125211016233>
- Gergelyfi, M., Sanz-Arigitá, E. J., Solopchuk, O., Dricot, L., Jacob, B., & Zénon, A. (2021). Mental fatigue correlates with depression of task-related network and augmented DMN activity but spares the reward circuit. *NeuroImage*, 243, 118532. <https://doi.org/10.1016/j.neuroimage.2021.118532>
- Greco, G., Tambolini, R., Ambruosi, P., & Fischetti, F. (2017). Negative effects of smartphone use on physical and technical performance of young footballers. *Journal of Physical Education and Sport*, 17(4), 2495-2501. doi:10.7752/jpes.2017.04280
- Habay, J., Proost, M., De Wachter, J., Díaz-García, J., De Pauw, K., Meeusen, R., Van Cutsem, J., & Roelands, B. (2021). Mental fatigue-associated decrease in table tennis performance: Is there an electrophysiological signature? *International Journal of Environmental Research and Public Health*, 18(24), 12906. doi: 10.3390/ijerph182412906

Hachard, B., Noé, F., Ceyte, H., Trajin, B., & Paillard, T. (2020). Balance control is impaired by mental fatigue due to the fulfilment of a continuous cognitive task or by the watching of a documentary. *Experimental Brain Research*, 238, 861-868.

<https://doi.org/10.1007/s00221-020-05758-2>

Hakim, H., Khemiri, A., Chortane, O. G., Boukari, S., Chortane, S. G, Bianco, A., Marsigliante, S., Patti, A., & Muscella, A. (2022). Mental fatigue effects on the produced perception of effort and its impact on subsequent physical performances. *International Journal of Environmental Research and Public Health*, 19(17), 10973. doi: 10.3390/ijerph191710973

Holgado, D., Troya, E., Perales, J. C., Vadillo, M. A., & Sanabria, D. (2021). Does mental fatigue impair physical performance? A replication study. *European Journal of Sport Science*, 21(5), 762-770. doi: 10.1080/17461391.2020.1781265

Kosack, M. H., Staiano, W., Folino, R., Hansen, M. B., & Lønbro, S. (2020,). The acute effect of mental fatigue on badminton performance in elite players. *International Journal of Sports Physiology and Performance*, 15, 632-638. <https://doi.org/10.1123/ijsp.2019-0361>

Kowalski, K. L., Tierney, B. C., & Christie A. D. (2022). Mental fatigue does not substantially alter neuromuscular function in young, healthy males and females. *Physiology & Behavior*, 253, 113855. <https://doi.org/10.1016/j.physbeh.2022.113855>

Le Mansec, Y., Pageaux, B., Nordez, A., Dorel, S. & Jubeau, M. (2018). Mental fatigue alters the speed and the accuracy of the ball in table tennis. *Journal of Sports Sciences*, 36(23), 2751-2759. <https://doi.org/10.1080/02640414.2017.1418647>

MacMahon, C., Schücker, L., Hagemann, N., & Strauss, B. (2014). Cognitive fatigue effects on physical performance during running. *Journal of Sport & Exercise Psychology*, 36, 375-381. <http://dx.doi.org/10.1123/jsep.2013-0249>

- Marcora, S. M., Staiano, W., & Manning, V. (2009). Mental fatigue impairs physical performance in humans. *Journal of Applied Physiology*, *106*, 857-864. doi: 10.1152/jappphysiol.91324.2008
- Martin, K., Thompson, K. G., Keegan, R., Ball, N., & Rattray, B. (2015). Mental fatigue does not affect maximal anaerobic exercise performance. *European Journal of Applied Physiology*, *115*, 715-725. doi: 10.1007/s00421-014-3052-1
- Martin, K., Staiano, W., Menaspà, P., Hennessey, T., Marcora, S., Keegan, R., Thompson, K. G., Martin, D., Halson, S., & Rattray, B. (2016). Superior inhibitory control and resistance to mental fatigue in professional road cyclists. *PLoS ONE*, *11*(7), e0159907. doi: 10.1371/journal.pone.0159907
- Moreira, A., Aoki, M. S., Franchini, E., da Silva Machado, D. G., Paludo, A. C., & Okano, A. H. (2018). Mental fatigue impairs technical performance and alters neuroendocrine and autonomic responses in elite young basketball players. *Physiology & Behavior*, *196*, 112-118. <https://doi.org/10.1016/j.physbeh.2018.08.015>
- Morris, A. J., & Christie, A. D. (2020). The effect of a mentally fatiguing task on postural balance control in young and older women. *Experimental Gerontology*, *132*, 110840. <https://doi.org/10.1016/j.exger.2020.110840>
- Pageaux, B., Marcora, S. M., & Lepers, R. (2013). Prolonged mental exertion does not alter neuromuscular function of the knee extensors. *Medicine & Science in Sports & Exercise*, *45*(12), 2254-2264. doi: 10.1249/MSS.0b013e31829b504a
- Pageaux, B., Lepers, R., Dietz, K. C., & Marcora, S. M. (2014). Response inhibition impairs subsequent self-paced endurance performance. *European Journal of Applied Physiology*, *114*, 1095-1105. doi: 10.1007/s00421-014-2838-5
- Pageaux, B., Marcora, S. M., Rozand, V., & Lepers, R. (2015). Mental fatigue induced by prolonged self-regulation does not exacerbate central fatigue during subsequent whole-

body endurance exercise. *Frontiers in Human Neuroscience*, 9, 67. doi:

10.3389/fnhum.2015.00067

Penna, E. M., Filho, E., Campos, B. T., Pires, D. A., Nakamura, F. Y., Mendes, T. T., Lopes,

T. R., Smith, M. & Prado, L. S. (2018a) Mental fatigue does not affect heart rate recovery but impairs performance in handball players. *Revista Brasileira de Medicina do Esporte*, 24 (5), 347-351. <http://dx.doi.org/10.1590/1517-869220182405180483>

Penna, E. M., Filho, E., Wanner, S. P., Campos, B. T., Quinan, G. R., Mendes, T. T., Smith,

M. R., & Prado, L. S. (2018b). Mental fatigue impairs physical performance in young swimmers. *Pediatric Exercise Science*, 30(2), 208-215. doi: 10.1123/pes.2017-0128

Persson, J., Larsson, A., & Reuter-Lorenz, P. A. (2013). Imaging fatigue of interference control reveals the neural basis of executive resource depletion. *Journal of Cognitive Neuroscience*, 25(3), 338-351. [https://doi.org/10.1162/jocn\\_a\\_00321](https://doi.org/10.1162/jocn_a_00321)

Pessoa, F. A., Pereira, L. C., de Oliveira Araújo, A., Oliveira, G. T. A., Pereira, D. C., &

Elsangedy, H. M. (2022). Mental fatigue prior to aerobic exercise reduces exercise pleasure and negatively affects implicit attitudes toward future exercise. *Perceptual and Motor Skills*, 129(3), 816-832. doi: 10.1177/00315125221091158

Queiros, V. S. de, Dantas, M., Fortes, L. de S., Silva, L. F. da, Silva, G. M. da, Dantas, P. M.

S., & Cabral, B. G. de A. T. (2021). Mental fatigue reduces training volume in resistance exercise: A cross-over and randomized study. *Perceptual and Motor Skills*, 128(1), 409-423. doi: 10.1177/0031512520958935

Rozand, V., Lebon, F., Papaxanthis, C., & Lepers, R. (2015). Effect of mental fatigue on speed-accuracy trade-off. *Neuroscience*, 297, 219-230. doi:

10.1016/j.neuroscience.2015.03.066

- Salam, H., Marcora, S. M., & Hopker, J. G. (2018). The effect of mental fatigue on critical power during cycling exercise. *European Journal of Applied Physiology*, 118, 85-92. doi: 10.1007/s00421-017-3747-1
- Schlichta, C., Cabral, L. L., da Silva, C. K., Bigliassi, M., & Pereira, G. (2022). Exploring the impact of mental fatigue and emotional suppression on the performance of high-intensity endurance exercise. *Perceptual and Motor Skills*, 129(4), 1053-1073. doi: 10.1177/00315125221093898
- Slimani, M., Znazen, H., Bragazzi, N. L., Zguira, M. S., & Tod, D. (2018). The effect of mental fatigue on cognitive and aerobic performance in adolescent active endurance athletes: Insights from a randomized counterbalanced, cross-over trial. *Journal of Clinical Medicine*, 7(12), 510. doi: 10.3390/jcm7120510
- Smith, M. R., Marcora, S. M., & Coutts, A. J. (2015). Mental fatigue impairs intermittent running performance. *Medicine & Science in Sports & Exercise*, 47(8), 1682-1690. doi: 10.1249/MSS.0000000000000592
- Smith, M. R., Coutts, A. J., Merlini, M., Deprez, D., Lenoir, M., & Marcora, S. M. (2016). Mental fatigue impairs soccer-specific physical and technical performance. *Medicine & Science in Sports & Exercise*, 48(2), 267-276. doi: 10.1249/MSS.0000000000000762
- Staiano, W., Bosio, A., Piazza, G., Romagnoli, M., & Invernizzi, P. L. (2019). Kayaking performance is altered in mentally fatigued young elite athletes. *The Journal of Sports Medicine and Physical Fitness*, 7. doi: 10.23736/S0022-4707.18.09051-5
- Trecroci, A., Boccolini, G., Duca, M., Formenti, D., & Alberti, G. (2020). Mental fatigue impairs physical activity, technical and decision-making performance during small-sided games. *PLoS ONE*, 15(9), e0238461. <https://doi.org/10.1371/journal.pone.0238461>

- Van As, S., Beckers, D. G. J., Geurts, S. A. E., Kompier, M. A. J., Husain, M., & Veling, H. (2021). The impact of cognitive and physical effort exertion on physical effort decisions: A pilot experiment. *Frontiers in Psychology, 12*, 645037. doi: 10.3389/fpsyg.2021.645037
- Van Cutsem, J., De Pauw, K., Buyse, L., Marcora, S., Meeusen, R., & Roelands, B. (2017). Effects of mental fatigue on endurance performance in the heat. *Medicine & Science in Sports & Exercise, 49*(8), 1677-1687. doi: 10.1249/MSS.0000000000001263
- Van Cutsem, J., De Pauw, K., Vandervaeren, C., Marcora, S., Meeusen, R., & Roelands, B. (2019). Mental fatigue impairs visuomotor response time in badminton players and controls. *Psychology of Sport & Exercise, 45*, 101579. <https://doi.org/10.1016/j.psychsport.2019.101579>
- Van Cutsem, J., Van Schuerbeek, P., Pattyn, N., Raeymaekers, H., De Mey, J., Meeusen, R., & Roelands, B. (2022). A drop in cognitive performance, whodunit? Subjective mental fatigue, brain deactivation or increased parasympathetic activity? It's complicated! *Cortex, 155*, 30-45. doi: 10.1016/j.cortex.2022.06.006
- Veness, D., Patterson, S. D., Jeffries, O., & Waldron, M. (2017). The effects of mental fatigue on cricket-relevant performance among elite players. *Journal of Sports Sciences, 35*(24), 2461-2467. <https://doi.org/10.1080/02640414.2016.1273540>
- Verschueren, J. O., Tassignon, B., Proost, M., Teugels, A., Van Cutsem, J., Roelands, B., Verhagen, E., & Meeusen, R. (2020). Does mental fatigue negatively affect outcomes of functional performance tests? *Medicine & Science in Sports & Exercise, 52*(9), 2002-2010. doi: 10.1249/MSS.0000000000002323
- Weerakkody, N. S., Taylor, C. J., Bulmer, C. L., Hamilton, D. B., Gloury, J., O'Brien, N. J., Saunders, J. H., Harvey, S., & Patterson, T. A. (2021). The effect of mental fatigue on the performance of Australian football specific skills amongst amateur athletes. *Journal*



*of Science and Medicine in Sport*, 24, 592-596.

<https://doi.org/10.1016/j.jsams.2020.12.003>

**Table A2:** List of studies using the sequential task protocols included in the systematic review.

| # | Authors                    | N  | Depleting task                                           | Task duration | TOT effect | Control task                      | Dependent task                                                                                                          | ST effect | Correlation between TOT and ST effects |
|---|----------------------------|----|----------------------------------------------------------|---------------|------------|-----------------------------------|-------------------------------------------------------------------------------------------------------------------------|-----------|----------------------------------------|
| 1 | Marcora et al. (2009)      | 16 | AX-CPT                                                   | 90 min        | Yes        | Watching a documentary            | Time to exhaustion while cycling at 80% PPO                                                                             | Yes       | Not reported                           |
| 2 | Brownsberger et al. (2013) | 12 | Vigilance task consisting responding to selected letters | 90 min        | NR         | Watching a documentary            | Two bouts of self-paced cycling exercise at RPE 11 and RPE 15                                                           | Yes       | Not reported                           |
| 3 | Pageaux et al. (2013)      | 10 | AX-CPT                                                   | 90 min        | No         | Watching a documentary            | Time to exhaustion while performing an isometric contraction at 20% MVC                                                 | Yes       | Not reported                           |
| 4 | Persson et al. (2013)      | 32 | High interference recognition task                       | > 20 min      | NR         | Low interference recognition task | Verb Generation Task                                                                                                    | Yes       | Not reported                           |
| 5 | MacMahon et al. (2014)     | 20 | AX-CPT                                                   | 90 min        | No         | Watching a documentary            | Time to perform a 3-km run                                                                                              | Yes       | Not reported                           |
| 6 | Pageaux et al. (2014)      | 12 | Incongruent Stroop task                                  | 30 min        | No         | Congruent Stroop task             | Time to perform a 5-km run                                                                                              | Yes       | Not reported                           |
| 7 | Duncan et al. (2015)       | 8  | Vigilance task consisting completing concentration grids | 40 min        | NR         | Watching a documentary            | Four 30-second Wingate Anaerobic Tests + Coincidence anticipation timing task + Minnesota Manual Dexterity Turning Test | Yes       | Not reported                           |
| 8 | Martin et al. (2015)       | 12 | AX-CPT                                                   | 90 min        | No         | Watching a documentary            | Countermovement jump, isometric leg extension,                                                                          | No        | Not reported                           |

|    |                             |              |                                      |        |     |                                               |                                                                              |                 |              |
|----|-----------------------------|--------------|--------------------------------------|--------|-----|-----------------------------------------------|------------------------------------------------------------------------------|-----------------|--------------|
|    |                             |              |                                      |        |     |                                               | and 3 min all out cycle test                                                 |                 |              |
| 9  | Pageaux et al. (2015)       | 12           | Incongruent Stroop task              | 30 min | No  | Congruent Stroop task                         | 6-min bout of cycling at 80% PPO                                             | No              | Not reported |
| 10 | Rozand et al. (2015)        | 10           | Incongruent Stroop task              | 90 min | NR  | Watching a documentary                        | Movement time in a Fitt's pointing task                                      | Yes             | Not reported |
| 11 | Smith et al. (2015)         | 10           | AX-CPT                               | 90 min | Yes | Watching a documentary                        | Running velocity in an intermittent running exercise                         | Yes             | Not reported |
| 12 | Azevedo et al. (2016)       | 8            | AX-CPT                               | 90 min | NR  | Watching a documentary                        | Endurance capacity in a cycling exercise at 80 % MPO                         | No              | Not reported |
| 13 | Badin et al. (2016)         | 20           | Stroop task                          | 30 min | NR  | Watching a documentary                        | Technical performance in small-sided soccer games                            | Yes             | Not reported |
| 14 | Martin et al. (2016)        | 11 PC + 9 RC | Incongruent Stroop task              | 30 min | PE  | 10-min at focusing on a centered black cross  | Power output in a 20-min time trial on a cycle ergometer                     | Yes, in RC only | Not reported |
| 15 | Smith et al. (2016) Study 2 | 14           | Incongruent Stroop task              | 30 min | NR  | Reading magazines                             | Loughborough soccer passing and shooting tests                               | Yes             | Not reported |
| 16 | Greco et al. (2017)         | 16           | Use of smartphones (Brain It on App) | 30 min | NR  | Carrying out usual activities before training | Yo-Yo Intermittent Recovery Test + Loughborough Soccer Passing Test          | Yes             | Not reported |
| 17 | Van Cutsem et al. (2017)    | 10           | Incongruent Stroop task              | 45 min | No  | Watching a documentary                        | Flanker task + 45-min bout of cycling at 60% + 15-min bout of cycling at 80% | No              | Not reported |

|    |                          |              |                         |        |     |                                              |                                                                               |     |              |
|----|--------------------------|--------------|-------------------------|--------|-----|----------------------------------------------|-------------------------------------------------------------------------------|-----|--------------|
| 18 | Veness et al. (2017)     | 10           | Incongruent Stroop task | 30 min | Yes | Reading magazines                            | Cricket run-two test + Batak Lite hand-eye coordination test + Yo-Yo-IR1 test | Yes | Not reported |
| 19 | Coutinho et al. (2018)   | 10           | Incongruent Stroop task | 30 min | NR  | No specific treatment before                 | Small-sided games                                                             | Yes | Not reported |
| 20 | Le Mansec et al. (2018)  | 22           | AX-CPT                  | 90 min | NR  | Watching a movie                             | Table tennis performance                                                      | Yes | Not reported |
| 21 | Moreira et al. (2018)    | 32           | Incongruent Stroop task | 30 min | PE  | 10-min at focusing on a centered black cross | Small-Sided-Games (SSG) technical performance                                 | Yes | Not reported |
| 22 | Penna et al. (2018a)     | 12           | Modified Stroop task    | 30 min | NR  | Watching a documentary                       | Yo-Yo IR1 test                                                                | Yes | Not reported |
| 23 | Penna et al. (2018b)     | 16           | Incongruent Stroop task | 30 min | NR  | Watching a documentary                       | 1500-m time trial of swimming                                                 | Yes | Not reported |
| 24 | Salam et al. (2018)      | 11           | Incongruent Stroop task | 30 min | NR  | Reading a magazine                           | Time to exhaustion while cycling at 40%, 60%, 80% or 100% $\dot{V}O_{2peak}$  | Yes | Not reported |
| 25 | Slimani et al. (2018)    | 10           | Incongruent Stroop task | 30 min | NR  | Reading magazines                            | d2 test + 20-m multistage fitness test                                        | Yes | Not reported |
| 26 | Brown et al. (2019)      | 25           | AX-CPT                  | 50 min | Yes | Watching a documentary                       | 30-min cycling exercise at a self-selected intensity                          | Yes | Not reported |
| 27 | Staiano et al. (2019)    | 13           | Incongruent Stroop task | 60 min | NR  | Watching a documentary                       | 2000-m kayaking time trial                                                    | Yes | Not reported |
| 28 | Filipas et al. (2019)    | 23           | Incongruent Stroop task | 30 min | No  | Watching a documentary                       | Distance covered in a 30-min cycling exercise                                 | Yes | Not reported |
| 29 | Van Cutsem et al. (2019) | 11 HC + 9 BP | Incongruent Stroop task | 90 min | Yes | Watching a documentary                       | Flanker task + Visuomotor task                                                | Yes | Not reported |

|    |                           |                          |                                  |        |           |                                                                   |                                                     |           |              |
|----|---------------------------|--------------------------|----------------------------------|--------|-----------|-------------------------------------------------------------------|-----------------------------------------------------|-----------|--------------|
| 30 | Ferreira et al. (2020)    | 20                       | Modified incongruent Stroop task | 30 min | NR        | Seating while receiving no stimuli                                | Reaction time task                                  | Yes       | Not reported |
| 31 | Gantois et al. (2020)     | 20                       | Stroop task                      | 30 min | NR        | Watching advertising videos                                       | Passing decision-making task + Stroop task          | Yes       | Not reported |
| 32 | Hachard et al. (2020)     | 20                       | AX-CPT                           | 90 min | Yes       | Watching a documentary                                            | Postural tasks                                      | Yes       | Not reported |
| 33 | Kosack et al. (2020)      | 19                       | Incongruent Stroop task          | 60 min | PE        | Watching a documentary                                            | Badminton-Specific Test + Countermovement-jump      | No        | Not reported |
| 34 | Morris & Christie (2020)  | 16 YA + 16 OA            | Psychomotor vigilance task       | 20 min | Yes in YA | Watching a documentary                                            | Postural task                                       | Yes in YA | Not reported |
| 35 | Verschueren et al. (2020) | 14                       | Incongruent Stroop task          | 90 min | No        | Watching a documentary                                            | Neurocognitive functional performance tests         | Yes       | Not reported |
| 36 | Batista et al. (2021)     | 15                       | Stroop task                      | 30 min | NR        | 10-min at focusing on a centered black cross + 20 min at relaxing | Time to perform an orienteering race                | No        | Not reported |
| 37 | De Queiros et al. (2021)  | 10                       | Stroop task                      | 30 min | NR        | Watching a documentary                                            | Countermovement jump + Half-back squat exercise     | Yes       | Not reported |
| 38 | Ferris et al. (2021)      | 8                        | AX-CPT                           | 60 min | NR        | Watching a documentary                                            | Incremental single-leg knee-extensor ergometry test | Yes       | Not reported |
| 39 | Filipas et al. (2021)     | 12 U14 + 12 U16 + 12 U18 | Incongruent Stroop task          | 30 min | No        | Reading magazines                                                 | Loughborough Soccer Passing and Shooting Tests      | Yes       | Not reported |

|    |                          |    |                                               |         |     |                          |                                                                                                                                                                    |     |              |
|----|--------------------------|----|-----------------------------------------------|---------|-----|--------------------------|--------------------------------------------------------------------------------------------------------------------------------------------------------------------|-----|--------------|
| 40 | Gantois et al. (2021)    | 20 | Social media activity through smartphone apps | 30 min  | NR  | Watching a documentary   | Three sets of Back-squat test with 80% of 15RM                                                                                                                     | No  | Not reported |
| 41 | Gergelyfi et al. (2021)  | 26 | Modified Stroop task                          | 90 min  | NR  | Reading health magazines | Missing Number task + Simple reaction time task                                                                                                                    | Yes | Not reported |
| 42 | Habay et al. (2021)      | 11 | Incongruent Stroop task                       | 60 min  | No  | Watching a documentary   | Flanker task + Visuomotor task                                                                                                                                     | Yes | Not reported |
| 43 | Holgado et al. (2021)    | 30 | AX-CPT                                        | 90 min  | NR  | Watching a documentary   | Time to exhaustion while cycling at 80% $VO_{2max}$                                                                                                                | No  | Not reported |
| 44 | Van As et al. (2021)     | 20 | 2-back task                                   | 45 min  | NR  | Watching a documentary   | Effort-Based Decision-Making task                                                                                                                                  | No  | Not reported |
| 45 | Weerakkody et al. (2021) | 25 | Stroop task                                   | 30 min  | Yes | Watching a documentary   | Standing vertical jump + running vertical jump + AFL agility test + 20 m-sprint test + Matthew Lloyd clean hands test + Brad Johnson goal kicking test + Yo-Yo IR1 | Yes | Not reported |
| 46 | Budini et al. (2022)     | 29 | Switch task                                   | 100 min | NR  | Watching a movie         | Postural, isometric and kinetic tremor, pinch force and steadiness tests + Purdue pegboard test                                                                    | No  | Not reported |
| 47 | Campos et al. (2022)     | 13 | Incongruent Stroop task                       | 30 min  | NR  | Watching a documentary   | Special Judo Fitness Test                                                                                                                                          | No  | Not reported |
| 48 | Ciocca et al. (2022)     | 10 | Video-based tactical task                     | 30 min  | NR  | Watching a documentary   | Small-sided game                                                                                                                                                   | No  | Not reported |
| 49 | Dallaway et al. (2022)   | 90 | Incongruent Stroop task / 2-back task         | 40 min  | PE  | Watching a documentary   | Self-paced rhythmic handgrip exercise                                                                                                                              | Yes | Not reported |

|    |                          |    |                                                     |        |                          |                                |                                                                |     |              |
|----|--------------------------|----|-----------------------------------------------------|--------|--------------------------|--------------------------------|----------------------------------------------------------------|-----|--------------|
| 50 | Fortes et al. (2022a)    | 18 | Using social media on a smartphone                  | 30 min | NR                       | Watching a documentary         | Visuomotor Task                                                | Yes | Not reported |
| 51 | Fortes et al. (2022b)    | 16 | Sport-based video games                             | 60 min | NR                       | Watching a documentary         | Incongruent Stroop task + Decision-making task                 | Yes | Not reported |
| 52 | Hakim et al. (2022)      | 12 | Stroop task                                         | 60 min | NR                       | Watching a documentary         | 20-min bout of cycling at a level of 13 on the Borg's scale    | No  | Not reported |
| 53 | Kowalski et al. (2022)   | 30 | Psychomotor Vigilance Task                          | 30 min | Yes                      | Watching a documentary         | 10 s isometric dorsiflexion contractions at 10, 20 and 50% MVC | No  | Not reported |
| 54 | Schlichta et al. (2022)  | 12 | Incongruent Stroop task<br>Emotion Suppression task | 30 min | NR                       | Seating in a comfortable chair | Cycling at 80% PPO until exhaustion                            | Yes | Not reported |
| 55 | Trecroci et al. (2022)   | 9  | Stroop task                                         | 30 min | NR                       | Watching a documentary         | Small-sided games                                              | Yes | Not reported |
| 56 | Van Cutsem et al. (2022) | 20 | Incongruent Stroop task                             | 90 min | Yes, for CS<br>PE for MS | Watching a documentary         | Flanker task                                                   | No  | Not reported |

Note: BP = Badminton players; CS = Color stimuli; HC = Healthy controls; MPO = Maximal power output; MS = Meaning stimuli; MVC = Maximal voluntary contraction; NR = Not reported; OA = Older adults; PC = Professional cyclists; PPO = Peak power output; RC = Recreational cyclists; ST = Sequential task; PE = Practice effect; TOT = Time-on-task; U14 = Soccer players under 14 years; U16 = Soccer players under 16 years; U18 = Soccer players under 18 years; YA = Young adults.
